# Supplementary material
Source: PubMed Central journal article supplement (PMC4091253)
Supplement: psb-8-e27432-s01.pdf [file psb-8-e27432-s01.pdf]

## **Supplemental Material to:**

**Akira Iwase\*, Nobutaka Mitsuda, Momoko Ikeuchi,  
Mariko Ohnuma, Chie Koizuka, Koich Kawamoto,  
Jun Imamura, Hiroshi Ezura, and Keiko Sugimoto\***

***Arabidopsis* WIND1 induces callus formation in  
rapeseed, tomato, and tobacco**

**Plant Signaling & Behavior 2013; 8(12)**

**<http://dx.doi.org/10.4161/psb.27432>**

**[www.landesbioscience.com/journals/psb/article/27432](http://www.landesbioscience.com/journals/psb/article/27432)**

**Table S1.** Origin of dataset

| <b>Species</b>                    | <b>Database</b>      |
|-----------------------------------|----------------------|
| <i>Arabidopsis thaliana</i>       | TAIR                 |
| <i>Brassica rapa</i>              | Phytozome            |
| <i>Gossypium raimondii</i>        | Phytozome            |
| <i>Malus domestica</i>            | GDR                  |
| <i>Manihot esculenta</i>          | Phytozome            |
| <i>Glycine max</i>                | Phytozome            |
| <i>Vitis vinifera</i>             | Genoscope            |
| <i>Populus trichocarpa</i>        | Phytozome            |
| <i>Solanum tuberosum</i>          | Phytozome            |
| <i>Eucalyptus grandis</i>         | Phytozome            |
| <i>Solanum lycopersicum</i>       | Sol Genomics Network |
| <i>Nicotiana benthamiana</i>      | Sol Genomics Network |
| <i>Jatropha curcas</i>            | KAZUSA               |
| <i>Oryza sativa</i>               | RAP-DB               |
| <i>Zea mays</i>                   | maizesequence.org    |
| <i>Sorghum bicolor</i>            | Phytozome            |
| <i>Phoenix dactylifera</i>        | QATAR-WEILL.CORNELL  |
| <i>Selaginella moellendorffii</i> | Phytozome            |
| <i>Physcomitrella patens</i>      | Phytozome            |
| <i>Chlamydomonas reinhardtii</i>  | Phytozome            |
| <i>Volvox carteri</i>             | Phytozome            |

---

**Name of the dataset file**

---

TAIR10\_pep\_20101214  
Brapa\_197\_cds\_primaryTranscriptOnly.fa  
Graimondii\_221\_cds\_primaryTranscriptOnly.fa  
Malus\_x\_domestica.v1.0.conensus\_CDS.fa  
cassava\_v1.1.cds.fa  
Gmax\_109\_cds.fa  
Vitis\_vinifera\_mRNA\_v1.fa  
Ptrichocarpa\_210\_cds.fa  
Stuberosum\_206\_cds\_primaryTranscriptOnly.fa  
Egrandis\_201\_cds\_primaryTranscriptOnly.fa  
ITAG2.3\_cds.fasta  
Niben.genome.v0.4.4.transcripts.annotated.fastas  
JAT\_r3.0.cds  
rap\_representative  
ZmB73\_5b\_FGS\_cds.fasta  
Sorbi1\_GeneModels\_Sbi1\_4\_nt.fasta  
PDK30-mrna.fsa  
Selmo1\_GeneModels\_FilteredModels3\_nt.fasta  
Ppatens\_152\_cds.fa  
Chlre4\_best\_transcripts\_2.fasta  
Volca1.GeneCatalog\_2007\_09\_13.transcripts.fasta

---
